# Supplementary material for: Calcium Carbonate Mineralization of Microalgae
Source: MDPI journal article supplement (doi:10.3390/biomimetics7040140), 2022-09-23
Supplement: s1 [file s1]

### Supplementary Materials:

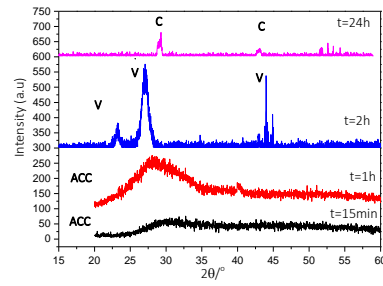

**Figure S1.** Precipitation (free drift) of calcium carbonate in supersaturated solutions ( $SR_{\text{calcite}} = 11.48$ ), at constant temperature, 25°C, in the presence of 100mg of AO culture, dried in ambient air. X-ray diffraction pattern of the precipitated solid.

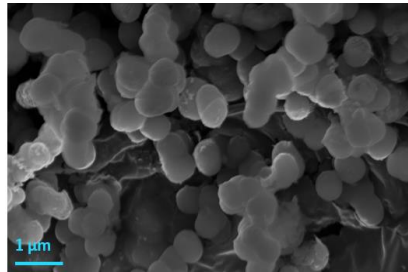

**Figure S2.** SEM photo of calcium carbonate precipitated in supersaturated solutions ( $SR_{\text{calcite}} = 11.48$ ), at a constant temperature of 25°C with free change of concentrations, in the presence of 100mg of dry microalgae, dried in ambient air at 25°C.
